# Supplementary material
Source: PubMed Central journal article supplement (PMC3787404)
Supplement: Supp_Fig1.pdf [file Supp_Fig1.pdf]

## Supplementary Data

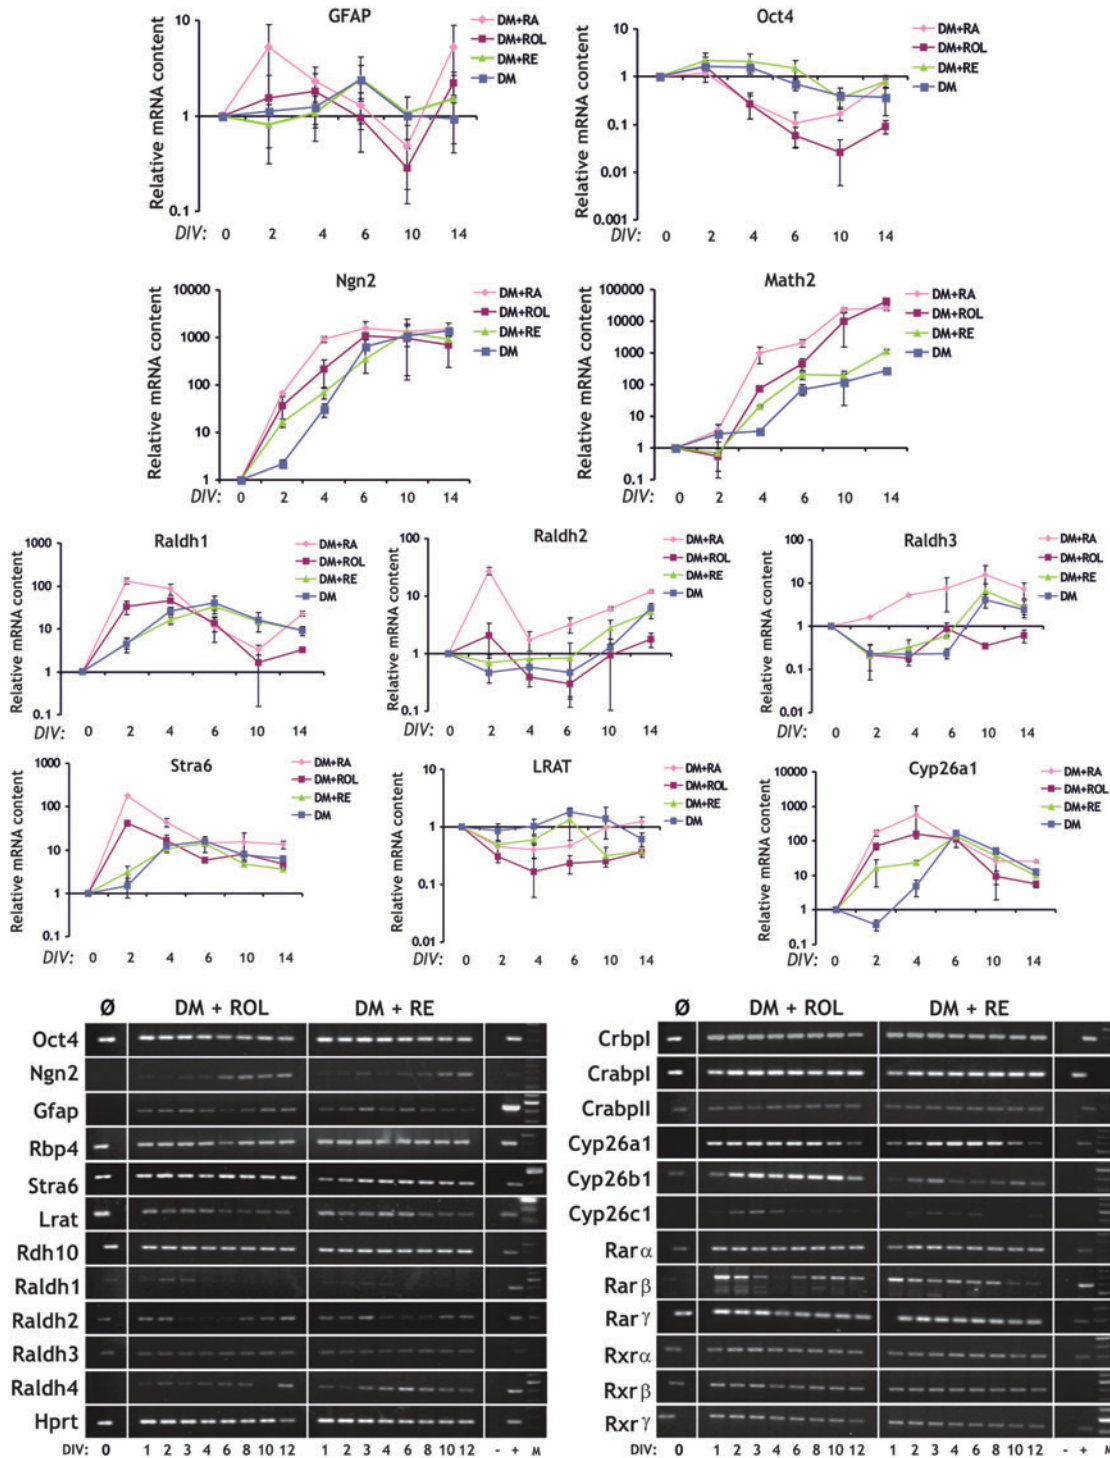

**SUPPLEMENTARY FIG. S1.** Gene expression in NE-4C neural stem cells grown in retinoid free or retinoid supplemented media. Expression of *Oct4*, *Ngn2*, *Math*, *GFAP*, and retinoid pathway specific genes in differentiating and nondifferentiated (Ø) NE-4C cells was determined by real-time PCR and RT-PCR. Line graphs show relative gene expression during differentiation (DIV2–DIV14) under various culture conditions compared to noninduced cells (DIV0). DM, retinoid free defined medium; DM+RE, ROL or RA, DM supplemented with 1  $\mu$ M RE, ROL or RA. DIV indicates in vitro days after the onset of induction. “-” and “+” represent the negative (water) and positive (total liver or brain) controls of the RT-PCR reactions. All real-time PCR data are Means  $\pm$  SD from triplicate data. Statistical analysis of the data is presented in Supplementary Table 1. RE, retinyl ester; ROL, retinol; RA, retinoic acid.
