# Supplementary material
Source: PubMed Central journal article supplement (PMC3787404)
Supplement: Supp_Fig2.pdf [file Supp_Fig2.pdf]

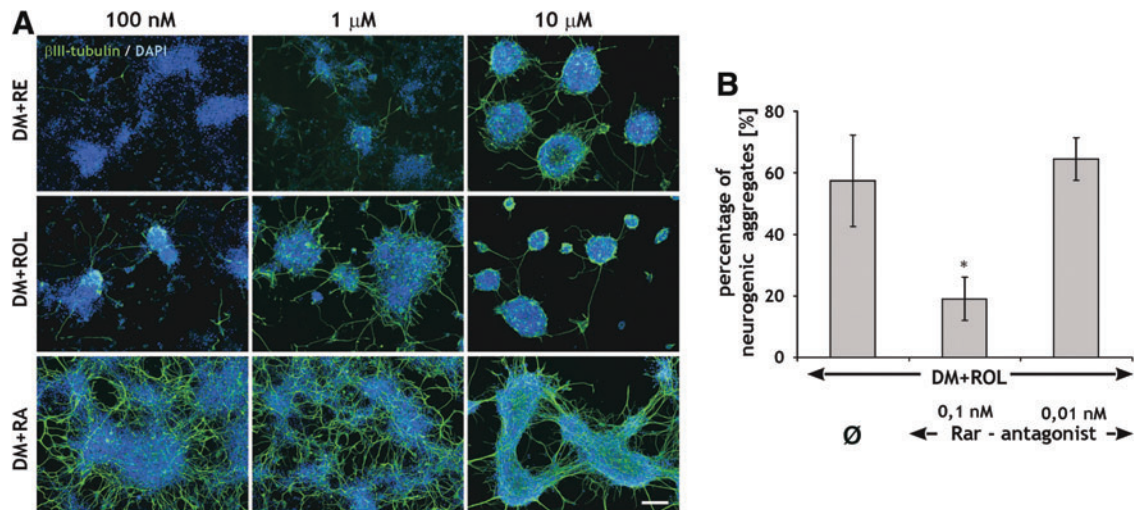

**SUPPLEMENTARY FIG. S2.** Concentration-dependent changes in retinoid induced neuronal differentiation of NE-4C neural stem cells. **(A)** Immunostainings for neuron-specific  $\beta$ -III tubulin in cultures of NE-4C neural stem cells grown in the presence of various RE, ROL, RA concentrations for 5 days. **(B)** Percentage of neuron-specific  $\beta$ -III tubulin positive neurogenic aggregates in ROL-induced cultures treated with small pan RAR antagonist concentrations. \* $P < 0.05$ . Scale bar: 100  $\mu$ m.
